1 **Zoonotic spillover of SARS-CoV-2: mink-adapted virus in humans**

2

3 Lukasz Rabalski<sup>1</sup> (<https://orcid.org/0000-0002-5292-9263>),

4 Maciej Kosinski<sup>1</sup> (<https://orcid.org/0000-0002-5475-7733>),

5 Natalia Mazur-Panasiuk<sup>2</sup> (<https://orcid.org/0000-0003-1167-2622>)

6 Boguslaw Szewczyk<sup>1</sup> (<https://orcid.org/0000-0003-4957-4059>),

7 Krystyna Bienkowska-Szewczyk<sup>3</sup> (<https://orcid.org/0000-0003-3650-2902>),

8 Ravi Kant<sup>4,5</sup> (<https://orcid.org/0000-0003-3878-9775>)

9 Tarja Sironen<sup>4,5</sup> (<https://orcid.org/0000-0002-2344-2755>),

10 Krzysztof Pyrc<sup>2,\*</sup> (<https://orcid.org/0000-0002-3867-7688>),

11 Maciej Grzybek<sup>6,\*</sup> (<https://orcid.org/0000-0002-8780-0304>)

12

13 **Affiliations**

14 <sup>1</sup> Laboratory of Recombinant Vaccines, Intercollegiate Faculty of Biotechnology of  
15 University of Gdansk and Medical University of Gdansk, Abrahama 58, 80-307, Gdansk,  
16 Poland

17 <sup>2</sup> Virogenetics Laboratory of Virology, Małopolska Centre of Biotechnology, Jagiellonian  
18 University, Gronostajowa 7A, 30-387, Kraków, Poland

19 <sup>3</sup> Laboratory of Virus Molecular Biology, Intercollegiate Faculty of Biotechnology of  
20 University of Gdansk and Medical University of Gdansk, Abrahama 58, 80-307, Gdansk,  
21 Poland

22 <sup>4</sup> Department of Virology, University of Helsinki, Haartmaninkatu 3, Helsinki FI-00290,  
23 Finland

24 <sup>5</sup> Department of Veterinary Biosciences, University of Helsinki, Agnes Sjöbergin katu 2,  
25 Helsinki FI-00790, Finland

26 <sup>6</sup> Department of Tropical Parasitology, Institute of Maritime and Tropical Medicine, Medical  
27 University of Gdansk, Powstania Styczniowego 9B, 81-519, Gdynia, Poland.

28

29 Corresponding authors: Maciej Grzybek and Krzysztof Pyrc

30 Corresponding author emails: [maciej.grzybek@gumed.edu.pl](mailto:maciej.grzybek@gumed.edu.pl) & [k.a.pyrc@uj.edu.p](mailto:k.a.pyrc@uj.edu.p)

31 **ABSTRACT**

32

33 The COVID-19 pandemic caused by SARS-CoV-2 started in fall 2019. A range of different  
34 mammalian species, including farmed mink, have been confirmed as susceptible to infection  
35 with this virus. We report here the spillover of mink-adapted SARS-CoV-2 from farmed  
36 mink to humans after extensive adaptation that lasted at least 3 months. We found the  
37 presence of four mutations in the S gene (that gave rise to variant: G75V, M177T, Y453F and  
38 C1247F) and others in an isolate obtained from SARS-CoV-2 positive patient.

39

40

41 **Keywords:** SARS-CoV-2; Bat coronavirus; mink; transmission; spillover; zoonoses;  
42 Expanding host range; jumping the species barrier

43

44 **Conflict of interest:** None declared

45

46

47

## 48        **1. Introduction**

49        Coronaviruses are known as potential zoonotic pathogens, and severe acute respiratory  
50        syndrome coronavirus 2 (SARS-CoV-2) is the third highly pathogenic member of this family  
51        to have emerged in the 21<sup>st</sup> century (1). While mass vaccinations are currently underway, the  
52        question of the fate of the virus remains open. The concept of herd immunity and eradication  
53        of the virus is somewhat unrealistic when considering the prevalence, genetic diversity, and  
54        the existing animal reservoirs. Thus far, SARS-CoV-2 infections have been reported in  
55        different mammalian species worldwide, including dogs, cats, tigers, lions, ferrets, minks,  
56        felines, and deer (2,3). SARS-CoV-2 infections in farmed mink have recently been confirmed  
57        in European countries (4). Transmission of the virus from infected mink to humans has been  
58        reported in Denmark and the Netherlands (5–7). After Denmark, Poland is the second-largest  
59        producer of mink pelts in Europe, with 354 active Polish mink farms harbouring  
60        approximately 6.3 million mink in total (8).

## 61        **2. Material and methods**

62  
63        This study was approved by the Independent Bioethical Committee for Scientific Research at  
64        the Medical University of Gdansk, Gdansk, Poland (Statement no. NKBBN/183/2020).

65  
66        SARS-CoV-2 genome sequencing was performed at the University of Gdansk, Poland using  
67        sample containing RNA isolated from positive swab (amplification of two target genes in  
68        RT-PCR). ARTICv3 amplicon generation followed by Oxford Nanopore Technology  
69        MinION run was performed (Quick 2020). Reads were basecalled, debarcoded and trimmed  
70        to delete adapter, barcode and PCR primer sequences. ARCTIC pipeline software were used  
71        to generate SARS-CoV-2 genome. Phylogenetic analysis was performed using the procedure  
72        recommended by Nextstrain.org (Hadfield et al., 2018)

### 73        **3. Results and Discussion**

74        The capacity of coronaviruses to transfer between mammalian species is not surprising. First,  
75        the transfer of highly pathogenic variants from bats usually occurs via intermediate hosts.  
76        Infection of dromedary camels and palm civets and later transfer to humans has been  
77        described for MERS-CoV and SARS-CoV, respectively (9). A more comprehensive analysis  
78        of existing strains suggests that this was not an exception. The human coronavirus OC43  
79        virus (HCoV-OC43) is a betacoronavirus described for the first time in the 1960s. This  
80        pathogen is associated with upper and lower respiratory tract disease in humans (10).  
81        Interestingly, closely related species are found in cattle (bovine coronavirus) and dogs  
82        (canine respiratory coronavirus). While the exact transfer route between different species  
83        remains unknown, it is conceivable that as in SARS-CoV-2, the virus has jumped between  
84        humans, and companion and farmed animals in the past (11).

85        Recently, we and others have detected SARS-CoV-2 infection in farmed minks in Northern  
86        Poland (12,13). The first report identified SARS-CoV-2 in samples collected from mink in  
87        mid-November 2020. While the prevalence of the virus was low and, most likely, only  
88        isolated cases were present, we have sequenced the isolates and have shown that the positive  
89        signal did not originate from contamination. The most recent data collected and deposited by  
90        the laboratory of the National Veterinary Research Institute in Poland has indicated isolation  
91        of the SARS-CoV-2 variants from animals at the same farm. Phylogenetic analysis of the  
92        data have indicated that the virus belongs to the B.1.1.279 lineage (Pangolin classification),  
93        which is not surprising considering the prevalence of this variant in Europe. Genome analysis  
94        shows that the new isolates carry the combination of mutations typical of viruses isolated  
95        already in November 2020 from mink (listed in Figure 1 bottom left radial tree), but  
96        additional new changes have accumulated since then. These include the Y453F mutation,

97 which was previously reported to have emerged in minks during serial passages (e.g., in  
98 Denmark and recently Lithuania), and a novel mutation not present in any global SARS-  
99 CoV-2 isolate that truncate ORF 7b at position L22. With all the available data taken into  
100 account, we speculate that the virus was present already in the mink population by November  
101 2020, presumably after a single introduction during the late summer or autumn of that year.

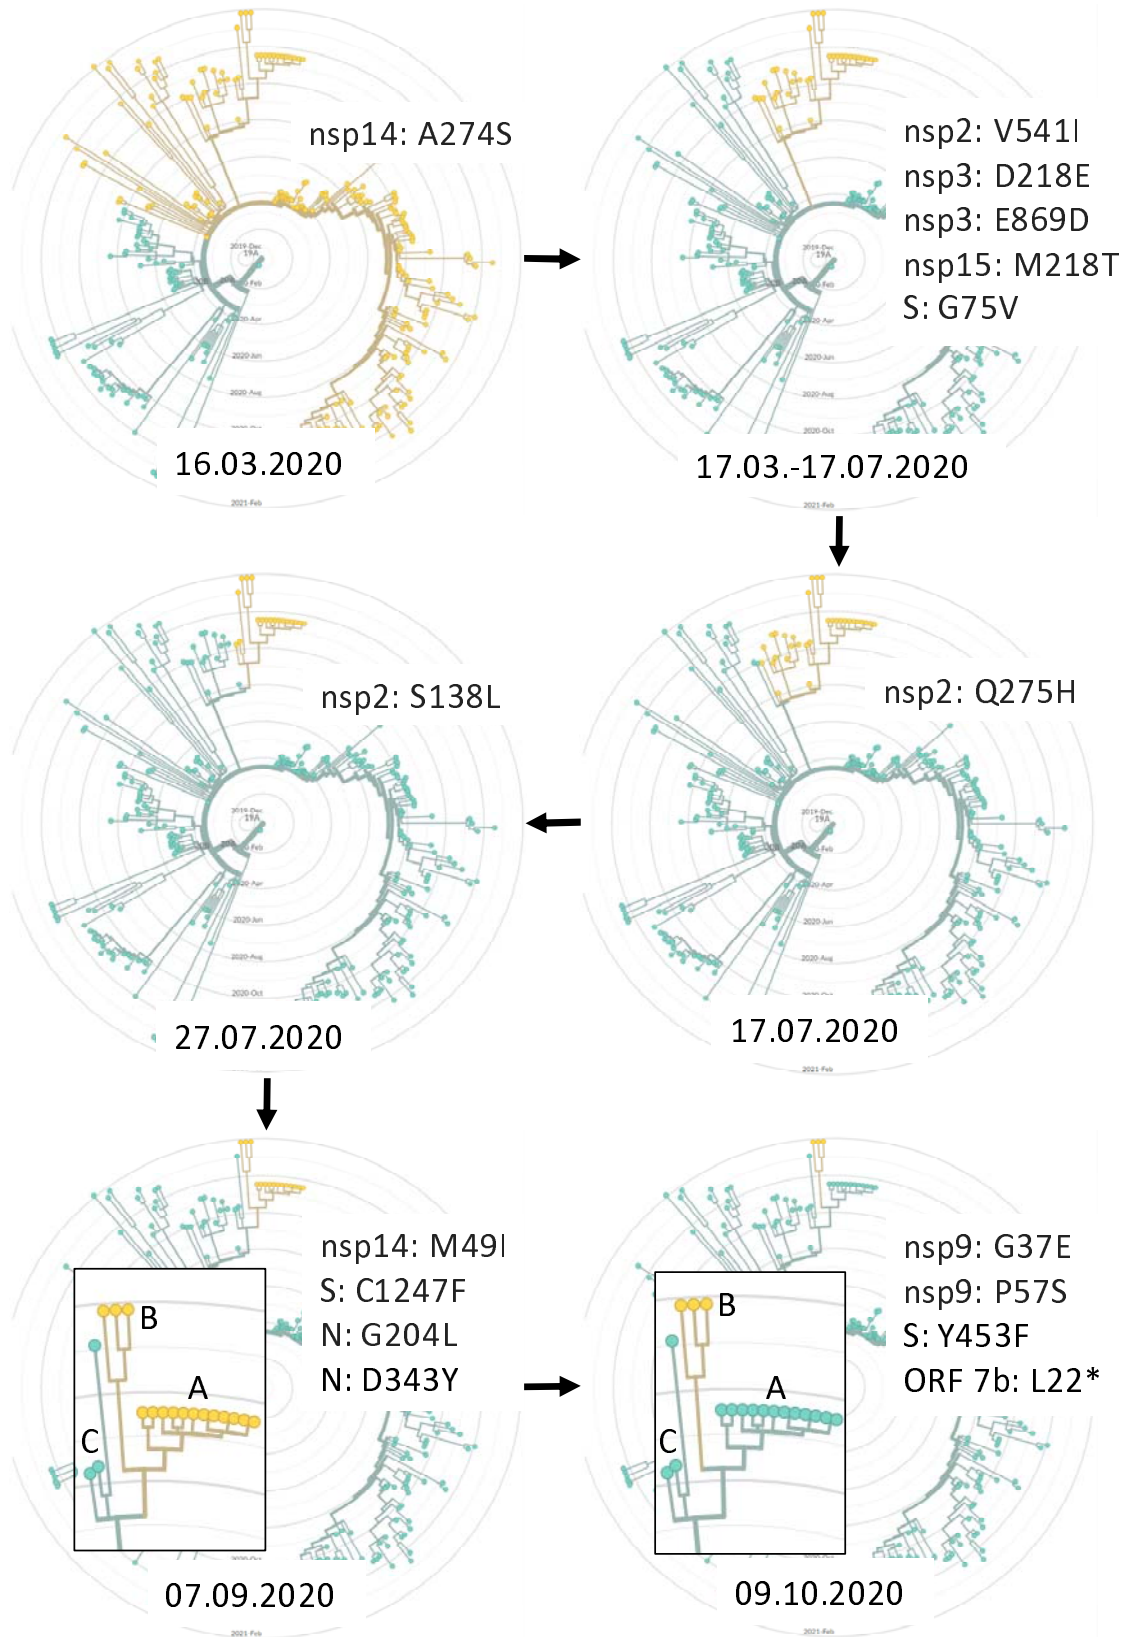

103 Figure 1. Phylogenetic analysis of SARS-CoV-2 lineage B.1.1.279 combined with inferred  
104 time (bottom of each radial time tree) of fixing mutations (upper right of each radial time  
105 tree) in all isolates form a group that leads to the generation of the mink variants. Yellow  
106 colour represents new variants, A - November 2020 mink isolates, B - January 2021 mink  
107 isolates and single human isolate, C - nearest neighbours human isolates that share a common  
108 ancestor with A-B: Norway/4235/2020, Germany/NW-HHU-340/2020, Iceland/4563/2021.

109 In the current study, we have identified a case of infection with a mink-adapted variant in  
110 humans. Following the identification of SARS-CoV-2 cases in farmed animals, the exposed  
111 staff were tested for SARS-CoV-2 (nasopharyngeal swabs) using RT-qPCR. A single positive  
112 case was detected in a sample collected on 1<sup>st</sup> February 2021 and was sequenced using the  
113 ARTIC Nanopore technology protocol. The resulting sequence has been deposited in  
114 GISAID under the accession number EPI\_ISL\_1034274. The host was asymptomatic.  
115 Phylogenetic analysis (Figure 1) shows that the virus clusters closely with viruses isolated  
116 from mink (group B on bottom radial trees). Further, mutations characteristic of the mink-  
117 adapted variant were present in the virus's genomic sequence (Table 1), confirming that it  
118 was most likely contracted by the infected subject from animals.

119 Table 1. Representation of mutations in mink originated SARS-CoV-2 isolates. Group A -  
120 November 2020 mink isolates, Group B - January 2021 mink isolates and single human  
121 isolate, C - nearest neighbours in lineage B.1.1.279 human isolates. The yellow colour  
122 represents mutations fixed in November 2020. The red colour represents mutations acquired  
123 during three months of passage at the mink farm.

124

| nt position | aa variant   | Reference | Group A | Group B | Group C |
|-------------|--------------|-----------|---------|---------|---------|
| 1218        | nsp2: S138L  | C         | T       | T       | T       |
| 1630        | nsp2: Q275H  | A         | T       | T       | T       |
| 2426        | nsp2: V541I  | G         | A       | A       | A       |
| 3373        | nsp3: D218E  | C         | A       | A       | A       |
| 5326        | nsp3: E869D  | G         | T       | T       | T       |
| 12795       | nsp9: G37E   | G         | G       | A       | G       |
| 12854       | nsp9: P57S   | C         | C       | T       | C       |
| 14408       | nsp12: P323L | C         | T       | T       | T       |
| 18186       | nsp14: M49I  | G         | T       | T       | G       |
| 18859       | nsp14: A274S | G         | T       | T       | T       |
| 20273       | nsp15: M218T | T         | C       | C       | C       |
| 21786       | S: G75V      | G         | T       | T       | T       |
| 22092       | S: M177T     | T         | T       | C       | T       |
| 22920       | S: Y453F     | A         | A       | T       | A       |
| 25302       | S: C1247F    | G         | T       | T       | G       |
| 27820       | ORF 7b: L22* | T         | T       | A       | T       |
| 28881/2     | N: R203K     | GG        | AA      | AA      | AA      |
| 28884       | N: G204L     | G         | T       | T       | G       |
| 29300       | N: D343Y     | G         | T       | T       | G       |

125

126 The emerging variant clearly reflects adaptation of the virus to the animal host, with some  
 127 point mutations fixed early during transmission between animals and additional changes  
 128 accumulating over time (Figure 1, bottom right). While the mutations' exact role is to be  
 129 determined, they may provide increased fitness in the new host (14). It remains unknown  
 130 whether these features alter the course of disease transmissibility, or immunogenicity in  
 131 humans (15). However, the variant should be tracked in the general population. Our results  
 132 confirm the need for country-scale epizootiological monitoring and careful analysis of SARS-  
 133 CoV-2 positive patients.

134

135

136 **REFERENCES:**

137 1. Cucinotta D, Vanelli M. WHO Declares COVID-19 a Pandemic. Acta Biomed



- 138 [Internet]. 2020;91(1):157–60. Available from:  
139 <http://www.ncbi.nlm.nih.gov/pubmed/32191675>
- 140 2. Palmer M V, Martins M, Falkenberg S, Buckley A, Caserta LC, Mitchell PK, et al.  
141 Susceptibility of white-tailed deer (*Odocoileus virginianus*) to SARS-CoV-2. bioRxiv  
142 [Internet]. 2021 Jan 1;2021.01.13.426628. Available from:  
143 <http://biorxiv.org/content/early/2021/01/14/2021.01.13.426628.abstract>
- 144 3. Abdel-Moneim AS, Abdelwhab EM. Evidence for SARS-CoV-2 Infection of Animal  
145 Hosts. *Pathogens* [Internet]. 2020 Jun 30;9(7):529. Available from:  
146 <https://www.mdpi.com/2076-0817/9/7/529>
- 147 4. World Organisation for Animal Health. World Organisation for Animal Health  
148 [Internet]. 2021 [cited 2021 Jan 12]. Available from: [https://www.oie.int/en/scientific-](https://www.oie.int/en/scientific-expertise/specific-information-and-recommendations/questions-and-answers-on-2019novel-coronavirus/events-in-animals/)  
149 [expertise/specific-information-and-recommendations/questions-and-answers-on-](https://www.oie.int/en/scientific-expertise/specific-information-and-recommendations/questions-and-answers-on-2019novel-coronavirus/events-in-animals/)  
150 [2019novel-coronavirus/events-in-animals/](https://www.oie.int/en/scientific-expertise/specific-information-and-recommendations/questions-and-answers-on-2019novel-coronavirus/events-in-animals/)
- 151 5. Hammer AS, Quaade ML, Rasmussen TB, Fonager J, Rasmussen M, Mundbjerg K, et  
152 al. SARS-CoV-2 Transmission between Mink ( *Neovison vison* ) and Humans,  
153 Denmark. *Emerg Infect Dis* [Internet]. 2021 Feb;27(2). Available from:  
154 [http://wwwnc.cdc.gov/eid/article/27/2/20-3794\\_article.htm](http://wwwnc.cdc.gov/eid/article/27/2/20-3794_article.htm)
- 155 6. Koopmans M. SARS-CoV-2 and the human-animal interface: outbreaks on mink  
156 farms. *Lancet Infect Dis* [Internet]. 2020 Nov;1. Available from:  
157 <https://linkinghub.elsevier.com/retrieve/pii/S1473309920309129>
- 158 7. Oude Munnink BB, Sikkema RS, Nieuwenhuijse DF, Molenaar RJ, Munger E,  
159 Molenkamp R, et al. Transmission of SARS-CoV-2 on mink farms between humans  
160 and mink and back to humans. *Science* (80- ) [Internet]. 2020 Nov 10;eabe5901.  
161 Available from: <https://www.sciencemag.org/lookup/doi/10.1126/science.abe5901>
- 162 8. EU Fur Association. EU Fur Association [Internet]. 2020 [cited 2020 Dec 13].

- 163 Available from: <https://www.sustainablefur.com/>
- 164 9. de Wit E, van Doremalen N, Falzarano D, Munster VJ. SARS and MERS: recent  
165 insights into emerging coronaviruses. *Nat Rev Microbiol* [Internet]. 2016 Aug  
166 27;14(8):523–34. Available from: <http://www.nature.com/articles/nrmicro.2016.81>
- 167 10. Kahn JS, McIntosh K. History and Recent Advances in Coronavirus Discovery.  
168 *Pediatr Infect Dis J* [Internet]. 2005 Nov;24(11):S223–7. Available from:  
169 <https://journals.lww.com/00006454-200511001-00012>
- 170 11. Szczepanski A, Owczarek K, Bzowska M, Gula K, Drebot I, Ochman M, et al. Canine  
171 Respiratory Coronavirus, Bovine Coronavirus, and Human Coronavirus OC43:  
172 Receptors and Attachment Factors. *Viruses* [Internet]. 2019 Apr 5;11(4):328.  
173 Available from: <https://www.mdpi.com/1999-4915/11/4/328>
- 174 12. Rabalski L, Kosinski M, Smura T, Aaltonen K, Kant R, Sironen T, et al. Detection and  
175 molecular characterisation of SARS-CoV-2 in farmed mink (*Neovison vison*) in  
176 Poland. *bioRxiv*. 2020;
- 177 13. GISAID. GISAID [Internet]. 2021 [cited 2021 Feb 18]. Available from:  
178 [https://www.epicov.org/epi3/EPI\\_ISL\\_984305,EPI\\_ISL\\_984307](https://www.epicov.org/epi3/EPI_ISL_984305,EPI_ISL_984307)
- 179 14. Zhao J, Cui W, Tian B. The Potential Intermediate Hosts for SARS-CoV-2. *Front*  
180 *Microbiol* [Internet]. 2020 Sep 30;11. Available from:  
181 <https://www.frontiersin.org/article/10.3389/fmicb.2020.580137/full>
- 182 15. Hayashi T, Yaegashi N, Konishi I. Effect of RBD mutation (Y453F) in spike  
183 glycoprotein of SARS-CoV-2 on neutralizing antibody affinity. *bioRxiv* [Internet].  
184 2020 Jan 1;2020.11.27.401893. Available from:  
185 <http://biorxiv.org/content/early/2020/11/28/2020.11.27.401893.abstract>
- 186
- 187

188 **Data availability**

189 The complete genome sequences of SARS-CoV-2 isolated from the patient was deposited in  
190 GISAID under the accession number: EPI\_ISL\_1034274

191 **Authors' contributions:**

192 The study was conceived and designed by LR and MG. Data handling: LR, MK, MG, KP.  
193 Material handling and laboratory work: LR, MK, NMP. Statistical and phylogenetic analysis  
194 was carried by LR. Interpretation of data: LR, KP, MK. Data visualisation: LR. Supervision:  
195 MG, KP, TS. The manuscript was written by LR, MG, KP, RK, TS, BS, KBS in consultation  
196 with all co-authors. MG, KP, LR, TS, RK revised the manuscript. All authors accepted the  
197 final manuscript version.

198 **Acknowledgements:**

199 We gratefully acknowledge the Authors from the Originating laboratories responsible for  
200 obtaining the specimens and the Submitting laboratories where genetic sequence data were  
201 generated and shared via the GISAID Initiative, on which this research is partially based.  
202
